# Supplementary material
Source: Research Square preprint supplement (doi:10.21203/rs.3.rs-9333190/v1)
Supplement: Supplementary file 1 [file 0b3e35164c3a963b9b9b96bc.docx]

|  | *Scotland* |
| --- | --- |
| Sex  Female  Male | 169 (53%)  150 (47%) |
| Age  >=65  <65 | 220 (69%)  99 (31%) |
| Tumor site  Right  Left  Rectum | 150 (47%)  99 (31%)  70 (22%) |
| TMN Stage  I  II  III | 25 (8%)  147 (46%)  147 (46%) |
| Differentiation  Moderate/Well  Poor | 287 (90%)  32 (10%) |
| MMR Status  Proficient  Deficient | 266 (83%)  53 (17%) |

Supplementary Table 1. Clinicopathological characteristics of colon cancer patient cohorts.
